# Supplementary material for: Laparoscopic sleeve gastrectomy under general anesthesia in severely obese patients: a single-centered retrospective study
Source: PeerJ. 2021 Feb 3;9:e10802. doi: 10.7717/peerj.10802 (PMC7866898; doi:10.7717/peerj.10802)
Supplement: Supplemental Information 1 [file peerj-09-10802-s001.xlsx]

## Sheet: 100例一般资料 
year	gender	age	height	weight	BMI	BMI	BMI
2017	male	26	175.9	167	63.0715	63.07	63.07
2017	female	21	160	160.5	62.1112	62.11	62.11
2018	male	26	170	166.5	61.3226	61.32	61.32
2017	male	25	200	181	61.0482	61.05	61.05
2019	female	49	123.6	144	59.6065	59.61	59.61
2017	male	36	155.8	166.5	56.2003	56.2	56.2
2017	male	22	146.4	164	54.4319	54.43	54.43
2017	male	22	166	176	53.5899	53.59	53.59
2019	female	24	139.8	162	53.2693	53.27	53.27
2019	male	18	180	184	53.1664	53.17	53.17
2017	male	25	162.5	175	53.0612	53.06	53.06
2019	male	55	145.5	167	52.1711	52.17	52.17
2018	male	27	132.3	160	51.6797	51.68	51.68
2019	male	41	145.2	169	50.8386	50.84	50.84
2018	male	19	142.9	168.5	50.3306	50.33	50.33
2019	female	26	127.6	161	49.2265	49.23	49.23
2017	male	26	163	182	49.209	49.21	49.21
2017	male	28	154.1	177.5	48.9109	48.91	48.91
2018	female	27	142.9	171	48.8697	48.87	48.87
2017	male	27	151	176	48.7474	48.75	48.75
2017	female	59	102.2	145	48.6088	48.61	48.61
2017	female	25	132.2	165	48.5583	48.56	48.56
2017	female	23	117.6	156	48.3235	48.32	48.32
2018	female	19	124.1	160.5	48.175	48.17	48.17
2019	female	34	144.2	174	47.6285	47.63	47.63
2018	male	23	144.6	174.5	47.4873	47.49	47.49
2017	male	37	143.3	174	47.3312	47.33	47.33
2018	male	34	154.1	181.5	46.7788	46.78	46.78
2019	male	40	148.1	178	46.7428	46.74	46.74
2019	male	43	127	165	46.6483	46.65	46.65
2017	female	38	120.9	161	46.6417	46.64	46.64
2017	female	59	102.1	150	45.3778	45.38	45.38
2017	male	23	138.7	176	44.7766	44.78	44.78
2017	male	30	137	176	44.2278	44.23	44.23
2017	female	24	126.2	169	44.1861	44.19	44.19
2017	female	31	116.6	162.5	44.1562	44.16	44.16
2017	female	26	124.6	168	44.1468	44.15	44.15
2017	male	25	120	165	44.0771	44.08	44.08
2018	female	25	116.8	163	43.961	43.96	43.96
2017	female	26	121	166	43.9106	43.91	43.91
2018	male	20	129	172	43.6047	43.6	43.6
2019	male	35	125.2	170	43.3218	43.32	43.32
2017	female	46	107.4	157.5	43.2955	43.3	43.3
2019	female	38	101	153	43.1458	43.15	43.15
2017	female	31	131	174.3	43.1198	43.12	43.12
2017	male	32	139.5	180.5	42.8174	42.82	42.82
2017	female	33	120.1	167.5	42.8069	42.81	42.81
2019	male	21	126.2	173	42.1665	42.17	42.17
2018	female	22	106.5	159	42.1265	42.13	42.13
2018	female	29	134.2	179	41.8838	41.88	41.88
2018	male	25	124.7	173	41.6653	41.67	41.67
2018	male	63	122.2	171.5	41.5473	41.55	41.55
2017	female	25	116.3	167.5	41.4524	41.45	41.45
2017	male	28	136.4	181.5	41.4058	41.41	41.41
2019	male	37	128.5	177.5	40.7856	40.79	40.79
2019	female	18	129.2	178.5	40.5496	40.55	40.55
2017	male	30	137.1	184	40.495	40.5	40.5
2017	female	48	102.2	159	40.4256	40.43	40.43
2017	female	19	116	170	40.1384	40.14	40.14
2017	male	29	118.7	172	40.123	40.12	40.12
2017	female	33	116.4	170.5	40.0409	40.04	40.04
2017	male	20	123.6	176	39.9019	39.9	39.9
2017	female	28	129.1	180	39.8457	39.85	39.85
2017	female	36	106.4	164.5	39.3197	39.32	39.32
2017	male	30	125.7	179	39.231	39.23	39.23
2018	female	59	106.2	165	39.0083	39.01	39.01
2019	female	40	92.3	154	38.9189	38.92	38.92
2019	female	31	94.6	156	38.8725	38.87	38.87
2017	female	27	106.8	166	38.7574	38.76	38.76
2017	female	30	107.9	167	38.6891	38.69	38.69
2019	male	33	114	172	38.5343	38.53	38.53
2017	female	36	87.8	151.5	38.2533	38.25	38.25
2017	female	34	92.6	156	38.0506	38.05	38.05
2019	female	64	96.1	159	38.0127	38.01	38.01
2019	male	30	109.8	170	37.9931	37.99	37.99
2018	male	35	120.1	178	37.9056	37.91	37.91
2018	female	36	98.7	161.5	37.8418	37.84	37.84
2018	female	48	91.4	155.5	37.7994	37.8	37.8
2017	female	31	100.6	163.5	37.6324	37.63	37.63
2018	male	28	132.2	187.5	37.6036	37.6	37.6
2017	male	24	118.3	177.5	37.5481	37.55	37.55
2017	female	31	93.1	158.5	37.0588	37.06	37.06
2017	female	34	89.4	155.5	36.9723	36.97	36.97
2017	male	20	108.5	171.5	36.8894	36.89	36.89
2017	female	22	94.4	160.5	36.6456	36.65	36.65
2017	female	33	106.7	171	36.4899	36.49	36.49
2018	male	29	103.7	169	36.3083	36.31	36.31
2017	female	24	99.9	166	36.2534	36.25	36.25
2017	female	25	109.3	174	36.1012	36.1	36.1
2019	male	26	122.6	185	35.8218	35.82	35.82
2019	female	24	98.5	166	35.7454	35.75	35.75
2018	male	28	99.2	167	35.5696	35.57	35.57
2018	female	28	97.7	166	35.4551	35.46	35.46
2017	female	59	90	159.5	35.377	35.38	35.38
2018	female	29	96.1	165	35.2984	35.3	35.3
2017	female	20	98.9	167.5	35.2506	35.25	35.25
2018	female	20	96.4	165.5	35.195	35.2	35.2
2019	male	43	97.4	166.5	35.1342	35.13	35.13
2018	female	37	88.5	159	35.0065	35.01	35.01
2019	male	44	98.8	168	35.0057	35.01	35.01
